# Supplementary material
Source: PubMed Central journal article supplement (PMC490000)
Supplement: pnas_101_29_10715__2.pdf [file pnas_101_29_10715__2.pdf]

**Table 1. Cerulenin-induced blockade of fatty acid synthase activity enhances the efficacy of Trastuzumab in HER-2/neu-overexpressing breast cancer cells**

### SK-Br3

| Cerulenin, $\mu\text{g/ml}$ | Trastuzumab $\text{IC}_{30}$ , $\mu\text{g/ml}^*$ | Sensitization factor <sup>†</sup> |
|-----------------------------|---------------------------------------------------|-----------------------------------|
| 0                           | $40.0 \pm 3.0$                                    | -                                 |
| 0.5                         | $3.20 \pm 1.0$                                    | 12                                |
| 1                           | $0.90 \pm 0.5$                                    | 44                                |
| 1.5                         | $0.20 \pm 0.1$                                    | 200                               |
| 2                           | -                                                 | -                                 |

### BT-474

| Cerulenin, $\mu\text{g/ml}$ | Trastuzumab $\text{IC}_{30}$ , $\mu\text{g/ml}^*$ | Sensitization factor <sup>†</sup> |
|-----------------------------|---------------------------------------------------|-----------------------------------|
| 0                           | $21.0 \pm 2.0$                                    | -                                 |
| 0.5                         | $3.80 \pm 1.0$                                    | 5                                 |
| 1                           | $1.00 \pm 0.5$                                    | 21                                |
| 1.5                         | $0.45 \pm 0.2$                                    | 47                                |
| 2                           | $0.40 \pm 0.1$                                    | 52                                |

SK-Br3 and BT-474 cells were incubated with serial dilutions of trastuzumab in the absence or presence of a given concentration of cerulenin for 72 h.

\* $\text{IC}_{30}$  is the concentration of trastuzumab which decreased cell viability by 30%, measured as described in Materials and Methods. Values are mean  $\pm$  SD of five independent experiments made in triplicate.

<sup>†</sup> Sensitization factors were obtained by dividing  $\text{IC}_{30}$  values of trastuzumab alone by those when cerulenin was supplemented.
