# Supplementary material
Source: PubMed Central journal article supplement (PMC490000)
Supplement: pnas_101_29_10715__3.pdf [file pnas_101_29_10715__3.pdf]

**Table 2. Trastuzumab-induced blockade of *HER-2/neu* signaling enhances cerulenin-induced cytotoxicity in *HER-2/neu*-overexpressing breast cancer cells**

### SK-Br3

| Trastuzumab, $\mu\text{g/ml}$ | Cerulenin $\text{IC}_{30}$ , $\mu\text{g/ml}$ * | Sensitization factor <sup>†</sup> |
|-------------------------------|-------------------------------------------------|-----------------------------------|
| 0                             | $1.6 \pm 0.5$                                   | -                                 |
| 2.5                           | $0.65 \pm 0.1$                                  | 3                                 |
| 5                             | $0.46 \pm 0.1$                                  | 4                                 |
| 10                            | $0.30 \pm 0.1$                                  | 5                                 |
| 20                            | $0.21 \pm 0.05$                                 | 8                                 |

### BT-474

| Trastuzumab, $\mu\text{g/ml}$ | Cerulenin $\text{IC}_{30}$ , $\mu\text{g/ml}$ * | Sensitization factor <sup>†</sup> |
|-------------------------------|-------------------------------------------------|-----------------------------------|
| 0                             | $2.3 \pm 2.0$                                   | -                                 |
| 2.5                           | $0.40 \pm 0.1$                                  | 6                                 |
| 5                             | $0.21 \pm 0.1$                                  | 11                                |
| 10                            | $0.12 \pm 0.1$                                  | 19                                |
| 20                            | $0.06 \pm 0.01$                                 | 38                                |

SK-Br3 and BT-474 cells were incubated with serial dilutions of cerulenin in the absence or presence of a given concentration of trastuzumab for 72 h.

\* $\text{IC}_{30}$  is the concentration of cerulenin which decreased cell viability by 30%, measured as described in *Materials and Methods*. Values are mean  $\pm$  SD of five independent experiments made in triplicate.

<sup>†</sup>Sensitization factors were obtained by dividing  $\text{IC}_{30}$  values of cerulenin alone by those when trastuzumab was supplemented.
